# Supplementary material
Source: PubMed Central journal article supplement (PMC6443042)
Supplement: NIHMS82413-supplement-Supplement_Table_4.pdf [file NIHMS82413-supplement-Supplement_Table_4.pdf]

Luciferase measurement data from Figure 2d

|                         | EV7-wt        | Loop          | PTC           | mAUG          | StrUP         | StrUP-PTC     | 2A-stop (NC)  | n = 3 |
|-------------------------|---------------|---------------|---------------|---------------|---------------|---------------|---------------|-------|
| <b>FF-bkg</b>           |               |               |               |               |               |               |               |       |
| #1                      | 8067          | 13083         | 13258         | 2249          | 13494         | 13824         | 84            |       |
| #2                      | 8122          | 11296         | 13007         | 1980          | 11761         | 13050         | 84            |       |
| #3                      | 9517          | 11507         | 12873         | 1759          | 13232         | 13715         | 110           |       |
| <b>RL-bkg</b>           |               |               |               |               |               |               |               |       |
| #1                      | 24749         | 34268         | 39851         | 41042         | 51331         | 52094         | 80354         |       |
| #2                      | 24673         | 34904         | 40032         | 40210         | 47449         | 49232         | 72713         |       |
| #3                      | 27128         | 32714         | 42168         | 37799         | 46512         | 52577         | 67824         |       |
| <b>FF/RL</b>            |               |               |               |               |               |               |               |       |
| #1                      | 0.3260        | 0.3818        | 0.3327        | 0.0548        | 0.2629        | 0.2654        | 0.0010        |       |
| #2                      | 0.3292        | 0.3236        | 0.3249        | 0.0492        | 0.2479        | 0.2651        | 0.0012        |       |
| #3                      | 0.3508        | 0.3517        | 0.3053        | 0.0465        | 0.2845        | 0.2609        | 0.0016        |       |
| <b>FF/RL mean</b>       | <b>0.3353</b> | <b>0.3524</b> | <b>0.3210</b> | <b>0.0502</b> | <b>0.2651</b> | <b>0.2638</b> | <b>0.0013</b> |       |
| <b>FF/RL SD</b>         | 0.0135        | 0.0291        | 0.0141        | 0.0042        | 0.0184        | 0.0025        | 0.0003        |       |
| <b>IRES activity, %</b> | <b>100.0</b>  | <b>105.1</b>  | <b>95.7</b>   | <b>15.0</b>   | <b>79.1</b>   | <b>78.7</b>   | <b>0.4</b>    |       |
| <b>SD</b>               | 4.0           | 8.7           | 4.2           | 1.3           | 5.5           | 0.8           | 0.09          |       |

Luciferase measurement data from Figure 6e-f

NC (Negative Control): 2A-stop (stop codon introduced before FFLuc in both ORFs)

| 3 hpt         | not infected | n | IRES   | cap    | IRES/cap | ppORF/uORF | ppORF/uORF | n = 6 |
|---------------|--------------|---|--------|--------|----------|------------|------------|-------|
|               |              |   | FF-bkg | RL-bkg | FF/RL    | mean       | SD         |       |
| IRES-ppORF    |              | 1 | 37041  | 484731 | 0.07642  | 12.64      |            |       |
|               |              | 2 | 34777  | 476957 | 0.07291  | 12.23      |            |       |
|               |              | 3 | 34773  | 465106 | 0.07476  | 11.86      | 11.86      | 0.50  |
|               |              | 4 | 32136  | 449960 | 0.07142  | 11.65      |            |       |
|               |              | 5 | 33260  | 459279 | 0.07242  | 11.35      |            |       |
|               |              | 6 | 35915  | 485611 | 0.07396  | 11.39      |            |       |
| IRES-uORF     |              | 1 | 3380   | 559090 | 0.00605  |            |            |       |
|               |              | 2 | 3482   | 584274 | 0.00596  |            |            |       |
|               |              | 3 | 3498   | 555132 | 0.00630  |            |            |       |
|               |              | 4 | 3170   | 517291 | 0.00613  |            |            |       |
|               |              | 5 | 3752   | 587799 | 0.00638  |            |            |       |
|               |              | 6 | 3374   | 519819 | 0.00649  | signal/ORF | n = 3      |       |
| IRES-ppORF NC |              | 1 | 224    | 774701 | 0.00029  | 0.0039     |            |       |
|               |              | 2 | 178    | 709994 | 0.00025  | 0.0034     |            |       |
|               |              | 3 | 214    | 765378 | 0.00028  | 0.0038     |            |       |
| IRES-uORF NC  |              | 1 | 652    | 625990 | 0.00104  | 0.17       |            |       |
|               |              | 2 | 588    | 616949 | 0.00095  | 0.15       |            |       |
|               |              | 3 | 548    | 616855 | 0.00089  | 0.14       |            |       |

| 3 hpt         | infected | n | IRES   | cap    | IRES/cap | ppORF/uORF | ppORF/uORF | n = 6 |
|---------------|----------|---|--------|--------|----------|------------|------------|-------|
|               |          |   | FF-bkg | RL-bkg | FF/RL    | mean       | SD         |       |
| IRES-ppORF    |          | 1 | 110239 | 157996 | 0.69773  | 24.60      |            |       |
|               |          | 2 | 100644 | 155177 | 0.64858  | 21.62      |            |       |
|               |          | 3 | 92597  | 151233 | 0.61228  | 17.72      | 20.14      | 2.55  |
|               |          | 4 | 93163  | 153331 | 0.60759  | 18.76      |            |       |
|               |          | 5 | 89623  | 154762 | 0.57910  | 18.62      |            |       |
|               |          | 6 | 87620  | 149135 | 0.58752  | 19.52      |            |       |
| IRES-uORF     |          | 1 | 5044   | 177856 | 0.02836  |            |            |       |
|               |          | 2 | 4746   | 158189 | 0.03000  |            |            |       |
|               |          | 3 | 5532   | 160137 | 0.03455  |            |            |       |
|               |          | 4 | 5378   | 166072 | 0.03238  |            |            |       |
|               |          | 5 | 5196   | 167048 | 0.03110  |            |            |       |
|               |          | 6 | 5026   | 166945 | 0.03011  | signal/ORF | n = 3      |       |
| IRES-ppORF NC |          | 1 | 501    | 207052 | 0.00242  | 0.0039     |            |       |
|               |          | 2 | 569    | 216978 | 0.00262  | 0.0042     |            |       |
|               |          | 3 | 615    | 224732 | 0.00274  | 0.0044     |            |       |
| IRES-uORF NC  |          | 1 | 1347   | 190958 | 0.00705  | 0.23       |            |       |
|               |          | 2 | 1399   | 182686 | 0.00766  | 0.25       |            |       |
|               |          | 3 | 1377   | 185504 | 0.00742  | 0.24       |            |       |

| 6 hpt         | not infected | n | IRES   | cap    | IRES/cap | ppORF/uORF | ppORF/uORF | n = 6 |
|---------------|--------------|---|--------|--------|----------|------------|------------|-------|
|               |              |   | FF-bkg | RL-bkg | FF/RL    | mean       | SD         |       |
| IRES-ppORF    |              | 1 | 51270  | 502471 | 0.10204  | 13.06      |            |       |
|               |              | 2 | 50518  | 480531 | 0.10513  | 14.51      |            |       |
|               |              | 3 | 50037  | 484038 | 0.10337  | 12.72      | 13.89      | 1.04  |
|               |              | 4 | 51428  | 466946 | 0.11014  | 13.79      |            |       |
|               |              | 5 | 56596  | 468766 | 0.12073  | 15.59      |            |       |
|               |              | 6 | 50109  | 469368 | 0.10676  | 13.65      |            |       |
| IRES-uORF     |              | 1 | 3895   | 498584 | 0.00781  |            |            |       |
|               |              | 2 | 3807   | 525428 | 0.00725  |            |            |       |
|               |              | 3 | 3709   | 456364 | 0.00813  |            |            |       |
|               |              | 4 | 3577   | 447851 | 0.00799  |            |            |       |
|               |              | 5 | 3809   | 491876 | 0.00774  |            |            |       |
|               |              | 6 | 3771   | 482007 | 0.00782  | signal/ORF | n = 3      |       |
| IRES-ppORF NC |              | 1 | 217    | 655593 | 0.00033  | 0.0031     |            |       |
|               |              | 2 | 201    | 645203 | 0.00031  | 0.0029     |            |       |
|               |              | 3 | 233    | 670679 | 0.00035  | 0.0032     |            |       |
| IRES-uORF NC  |              | 1 | 815    | 618327 | 0.00132  | 0.17       |            |       |
|               |              | 2 | 793    | 588577 | 0.00135  | 0.17       |            |       |
|               |              | 3 | 801    | 635167 | 0.00126  | 0.16       |            |       |

| 6 hpt         | infected | n | IRES   | cap    | IRES/cap | ppORF/uORF | ppORF/uORF | n = 6 |
|---------------|----------|---|--------|--------|----------|------------|------------|-------|
|               |          |   | FF-bkg | RL-bkg | FF/RL    | mean       | SD         |       |
| IRES-ppORF    |          | 1 | 299902 | 112103 | 2.67524  | 25.45      |            |       |
|               |          | 2 | 294808 | 120601 | 2.44449  | 23.52      |            |       |
|               |          | 3 | 282333 | 116265 | 2.42836  | 20.62      | 22.94      | 2.23  |
|               |          | 4 | 283958 | 124990 | 2.27185  | 20.02      |            |       |
|               |          | 5 | 293082 | 119426 | 2.45409  | 23.04      |            |       |
|               |          | 6 | 319161 | 128332 | 2.48699  | 25.00      |            |       |
| IRES-uORF     |          | 1 | 12387  | 117828 | 0.10513  |            |            |       |
|               |          | 2 | 11961  | 115100 | 0.10392  |            |            |       |
|               |          | 3 | 13131  | 111513 | 0.11775  |            |            |       |
|               |          | 4 | 12279  | 108207 | 0.11348  |            |            |       |
|               |          | 5 | 12281  | 115315 | 0.10650  |            |            |       |
|               |          | 6 | 11530  | 115883 | 0.09950  | signal/ORF | n = 3      |       |
| IRES-ppORF NC |          | 1 | 1235   | 151745 | 0.00814  | 0.0033     |            |       |
|               |          | 2 | 1401   | 148205 | 0.00945  | 0.0038     |            |       |
|               |          | 3 | 1353   | 151235 | 0.00895  | 0.0036     |            |       |
| IRES-uORF NC  |          | 1 | 4173   | 140949 | 0.02961  | 0.27       |            |       |
|               |          | 2 | 4195   | 141497 | 0.02965  | 0.28       |            |       |
|               |          | 3 | 4037   | 137781 | 0.02930  | 0.27       |            |       |

| 9 hpt         | not infected | n | IRES   | cap    | IRES/cap | ppORF/uORF | ppORF/uORF | n = 6 |
|---------------|--------------|---|--------|--------|----------|------------|------------|-------|
|               |              |   | FF-bkg | RL-bkg | FF/RL    | mean       | SD         |       |
| IRES-ppORF    |              | 1 | 35224  | 205930 | 0.17105  | 15.90      |            |       |
|               |              | 2 | 35837  | 194682 | 0.18408  | 17.78      |            |       |
|               |              | 3 | 35224  | 212861 | 0.16548  | 14.63      | 15.96      | 1.07  |
|               |              | 4 | 38680  | 204254 | 0.18937  | 16.43      |            |       |
|               |              | 5 | 38117  | 222618 | 0.17122  | 15.48      |            |       |
|               |              | 6 | 38203  | 205418 | 0.18598  | 15.54      |            |       |
| IRES-uORF     |              | 1 | 2196   | 204145 | 0.01076  |            |            |       |
|               |              | 2 | 2082   | 201092 | 0.01035  |            |            |       |
|               |              | 3 | 2304   | 203745 | 0.01131  |            |            |       |
|               |              | 4 | 2258   | 195930 | 0.01152  |            |            |       |
|               |              | 5 | 2530   | 228786 | 0.01106  |            |            |       |
|               |              | 6 | 2716   | 226884 | 0.01197  | signal/ORF | n = 3      |       |
| IRES-ppORF NC |              | 1 | 114    | 231293 | 0.00049  | 0.0028     |            |       |
|               |              | 2 | 122    | 260675 | 0.00047  | 0.0026     |            |       |
|               |              | 3 | 132    | 270523 | 0.00049  | 0.0027     |            |       |
| IRES-uORF NC  |              | 1 | 446    | 269947 | 0.00165  | 0.15       |            |       |
|               |              | 2 | 438    | 263203 | 0.00166  | 0.15       |            |       |
|               |              | 3 | 412    | 286905 | 0.00144  | 0.13       |            |       |

| 9 hpt         | infected | n | IRES   | cap    | IRES/cap | ppORF/uORF | ppORF/uORF | n = 6 |
|---------------|----------|---|--------|--------|----------|------------|------------|-------|
|               |          |   | FF-bkg | RL-bkg | FF/RL    | mean       | SD         |       |
| IRES-ppORF    |          | 1 | 291030 | 50285  | 5.78761  | 24.45      |            |       |
|               |          | 2 | 280233 | 50580  | 5.54039  | 24.43      |            |       |
|               |          | 3 | 293852 | 54065  | 5.43516  | 21.15      | 23.05      | 1.73  |
|               |          | 4 | 277057 | 56362  | 4.91567  | 20.56      |            |       |
|               |          | 5 | 267315 | 51416  | 5.19906  | 23.75      |            |       |
|               |          | 6 | 293263 | 54013  | 5.42949  | 23.94      |            |       |
| IRES-uORF     |          | 1 | 11134  | 47037  | 0.23671  |            |            |       |
|               |          | 2 | 11026  | 48621  | 0.22677  |            |            |       |
|               |          | 3 | 11570  | 45021  | 0.25699  |            |            |       |
|               |          | 4 | 11851  | 49565  | 0.23910  |            |            |       |
|               |          | 5 | 11222  | 51272  | 0.21887  |            |            |       |
|               |          | 6 | 11488  | 50662  | 0.22676  | signal/ORF | n = 3      |       |
| IRES-ppORF NC |          | 1 | 953    | 59268  | 0.01608  | 0.0030     |            |       |
|               |          | 2 | 991    | 62701  | 0.01581  | 0.0029     |            |       |
|               |          | 3 | 997    | 61860  | 0.01612  | 0.0030     |            |       |
| IRES-uORF NC  |          | 1 | 3115   | 64860  | 0.04803  | 0.21       |            |       |
|               |          | 2 | 3297   | 69307  | 0.04757  | 0.20       |            |       |
|               |          | 3 | 2887   | 61238  | 0.04714  | 0.20       |            |       |

| 12 hpt     | not infected | n | IRES   | cap    | IRES/cap | ppORF/uORF | ppORF/uORF | n = 6 |
|------------|--------------|---|--------|--------|----------|------------|------------|-------|
|            |              |   | FF-bkg | RL-bkg | FF/RL    | mean       | SD         |       |
| IRES-ppORF |              | 1 | 23917  | 86455  | 0.27664  | 19.15      |            |       |
|            |              | 2 | 18729  | 70331  | 0.26630  | 16.82      |            |       |
|            |              | 3 | 17210  | 70774  | 0.24317  | 14.65      | 16.98      | 1.78  |
|            |              | 4 | 19766  | 79935  | 0.24728  | 15.61      |            |       |
|            |              | 5 | 17059  | 69460  | 0.24559  | 18.93      |            |       |
|            |              | 6 | 16149  | 63409  | 0.25468  | 16.70      |            |       |
| IRES-uORF  |              | 1 | 990    | 68514  | 0.01445  |            |            |       |
|            |              | 2 | 1238   | 78216  | 0.01583  |            |            |       |
|            |              | 3 | 1100   | 66285  | 0.01660  |            |            |       |
|            |              | 4 | 968    | 61114  | 0.01584  |            |            | </    |
